# Supplementary material for: Tuning the electrical property via defect engineering of single layer MoS2 by oxygen plasma
Source: Royal Society of Chemistry journal article supplement (doi:10.1039/c4nr02142h), 2014-01-01
Supplement: c4nr02142h1.pdf [file c4nr02142h1.pdf]

## Electrical property tuning via defect engineering of single layer MoS<sub>2</sub> by oxygen plasma

Muhammad R. Islam,<sup>a,b</sup> Narae Kang<sup>a,b</sup>, Udai Bhanu<sup>a,b</sup>, Mikhail Erementchouk<sup>a,b</sup>, Laurene Tetard<sup>a,b</sup>, Michael N. Leuenberger<sup>a,b,d</sup>, and Saiful I. Khondaker<sup>a,b,c,\*</sup>

<sup>a</sup> Nanoscience Technology Center, <sup>b</sup> Department of Physics, <sup>c</sup> School of Electrical Engineering and Computer Science, <sup>d</sup> College of Optics and Photonics (CREOL), University of Central Florida, Orlando, Florida 32826, USA.

\* To whom correspondence should be addressed. E-mail: saiful@ucf.edu

### 1. Resistance versus plasma time for V<sub>g</sub> = 20 V:

Figure S1(a) shows the  $I_D$ - $V_{DS}$  graph of the device at  $V_G = 20V$  for different plasma exposure time. Figure S1(b) shows the dependence of resistance on the plasma exposure time. A large

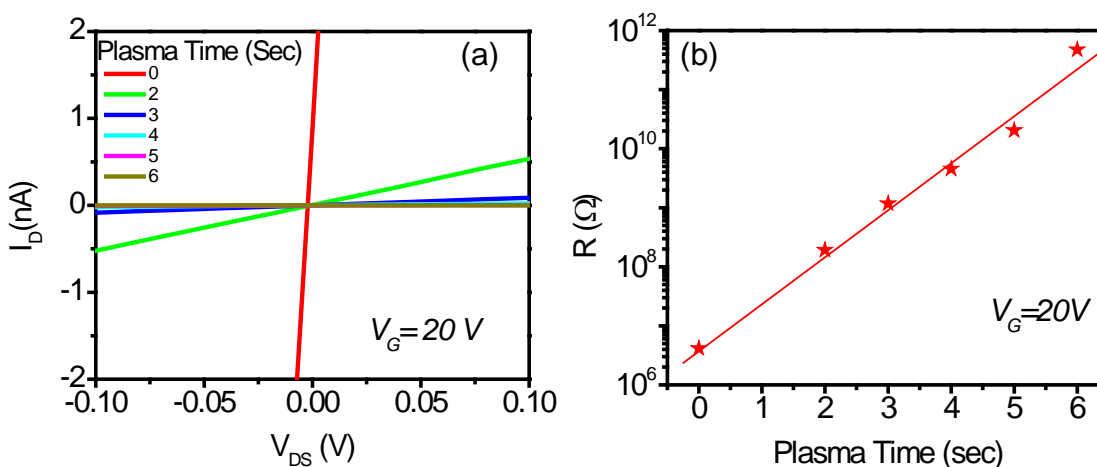

**S1.** (a)  $I_D$  vs  $V_{DS}$  characteristics curve for the single layers MoS<sub>2</sub> device at different plasma exposure at  $V_G=20V$ . (b) Resistance of the device as a function of plasma exposure time at  $V_G=20V$

variation in resistance is observed after plasma exposure which increased exponentially with the plasma exposure time.

## 2. Effect of oxygen plasma on a second single layer device:

Transfer characteristic of the a second single layer device after different plasma exposure are shown in Figure S2(a). For the convenience of comparison and to obtain a unified view of the curves, we multiplied the curve for 0 sec exposure by 0.01. The on current at  $V_G=40$  V is displayed in a semi-log scale in Figure S2(b) (right axis). The drain current varies exponentially with time from  $\sim 76$  nA for the as fabricated sample to value of less than 15 pA for 6 sec plasma exposure. Similar to the on-current, the mobility also drops exponentially from  $7.3$   $\text{cm}^2/\text{Vs}$  for as

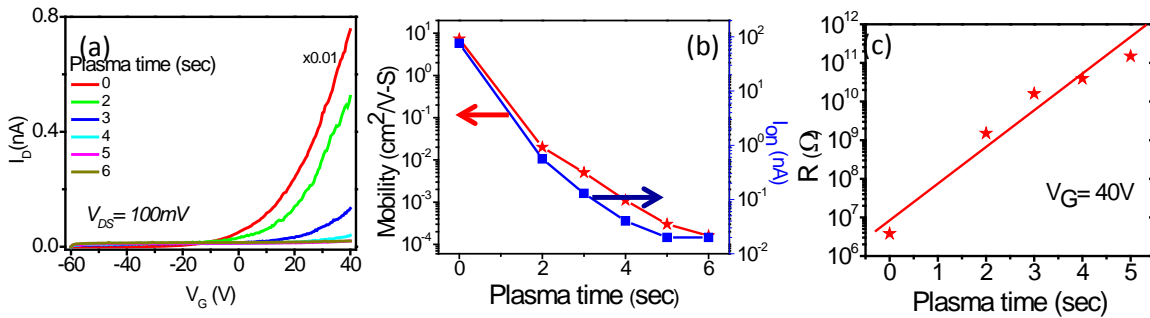

**S2.** (a) Gate dependence of the source drain current ( $I_D$ ) for another single layer device. The curve corresponds to plasma exposure time of 0, 2, 3, 4, 5, 6, sec respectively. (b) Effect of plasma exposure on the on current (at  $V_G=40\text{V}$ ) and mobility of the single layers  $\text{MoS}_2$  device. (c) Resistance of the device as a function of plasma exposure time.

fabricated sample to  $1.6 \times 10^{-4}$   $\text{cm}^2/\text{Vs}$ , after the 6 s plasma exposure. Figure S3(c) shows the dependence of with plasma exposure time. A five order increase in resistance is observed with the plasma exposure time.

### 3. Scanning electron microscope image of plasma exposed MoS<sub>2</sub> flake:

To check any possible change in the surface morphology of the plasma exposed MoS<sub>2</sub> flake we have taken the Scanning electron microscope (SEM) image of a single layer flake before and after plasma exposure. This is shown in figure S3. No signature of etching was observed from

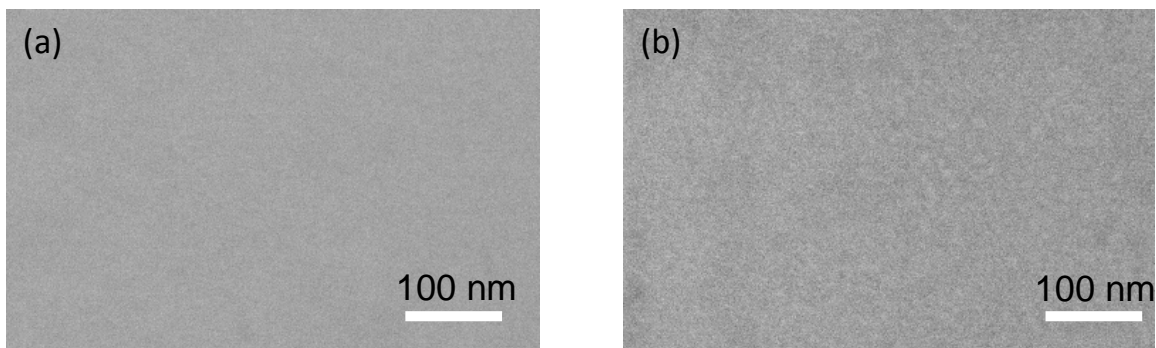

S3. SEM image of a single layer MoS<sub>2</sub> flake (a) before and (b) after 6s plasma exposure.

the figure.

### 4. Theoretical calculation of resistance:

We considered the plasma-treated material as an effective-medium semiconductor (EMSC). This is shown in figure S4, where right side figure show that the intact MoS<sub>2</sub> underneath the gold

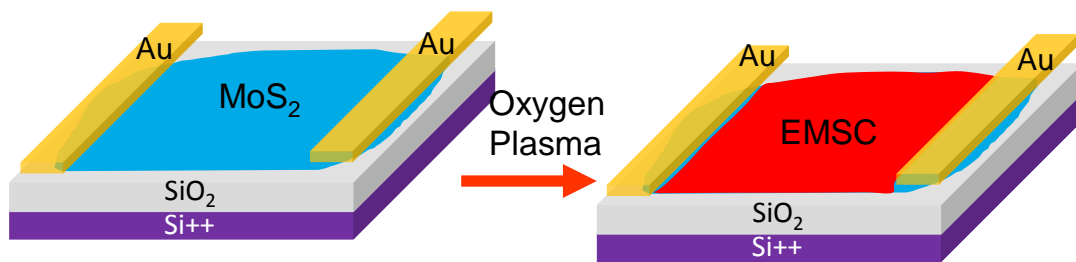

S4. Schematic of creating of EMSC region upon plasma exposure showing MoS<sub>2</sub> – EMSC heterojunction.

electrode formed a heterojunction with EMSC. The current through a heterojunction with a relatively high built-in potential  $\Delta\phi$  has a form similar to the Shockley diode equation,

$$I = I_s \left( e^{eV/nk_B T} - 1 \right) \approx I_s \frac{eV}{nk_B T} \quad \text{----- (1)}$$

where  $V$  is applied voltage,  $k_B$  is the Boltzmann constant,  $T$  is temperature,  $n$  is the ideality factor. The dependence on the band mismatch at the heterojunction enters this equation through the saturation current

$$I_s(\Delta\phi) \approx A T^2 \exp\left(-\frac{\Delta\phi}{k_B T}\right),$$

where  $A = em^*k_B^2 / (2\pi^2\hbar^3)$  is the Richardson constant. In order to define an effective resistance of the heterojunction we consider the limit of small applied voltage,  $V \ll V_T = nk_B T / e \approx 0.2$  V (for  $T = 400$  K and  $n = 1$ ) and rewrite Eq. (1) as  $I = V/R(\Delta\phi)$ , where  $R(\Delta\phi) = V_T / I_s(\Delta\phi)$ .

Thus we find

$$\ln[R(\Delta\phi)] = C + \frac{\Delta\phi}{k_B T}.$$

This formula provides the dependence of total resistance on  $\Delta\phi$  in the case when the junction under consideration makes the major contribution.
